# Supplementary material
Source: PubMed Central journal article supplement (PMC5072749)
Supplement: NIHMS818765-supplement-sup.pdf [file NIHMS818765-supplement-sup.pdf]

## Supplemental Information

### **Multigene measurable residual disease assessment improves AML relapse risk stratification in autologous hematopoietic cell transplantation**

Matthew P. Mulé<sup>1</sup>, Gabriel N. Mannis<sup>2</sup>, Brent L. Wood<sup>3</sup>, Jerald P. Radich<sup>3</sup>, Jimmy Whang<sup>2</sup>, Nestor R. Ramos<sup>1</sup>, Charalambos Andreadis<sup>2</sup>, Lloyd Damon<sup>2</sup>, Aaron C. Logan<sup>2</sup>, Thomas G. Martin<sup>2</sup> and Christopher S. Hourigan<sup>1</sup>

<sup>1</sup>*Myeloid Malignancies Section, Hematology Branch, National Heart, Lung and Blood Institute, National Institutes of Health, Bethesda, MD. 20892-1583, USA*

<sup>2</sup>*Department of Medicine, Division of Hematology and Blood and Marrow Transplantation, University of California, San Francisco, CA. 94143, USA.*

<sup>3</sup>*Fred Hutchinson Cancer Research Center, Seattle, WA. 98109, USA*

|                            |   |
|----------------------------|---|
| Supplemental Methods ..... | 2 |
| Supplemental Figures ..... | 5 |
| Supplemental Tables .....  | 9 |

## SUPPLEMENTAL METHODS

### RQ-PCR Information

Previously validated, specific RQ-PCR assays were utilized with additional positive controls performed to confirm specificity and robust amplification for each assay (Plasmid standards, plus K562 or patient samples with known mutations of interest). For RQ-PCR runs using patient samples, no template control wells were negative. In addition, the PCR efficiency, slope and R<sup>2</sup> for each assay was assessed with each batch of patient samples and was within acceptable range (e.g. WT1 n=7 batches: efficiency range 89-105%, average 94.4, R<sup>2</sup> range 0.993-0.999 average 0.996, slope range -3.2 - -3.62 average -3.46). Standard deviation of plasmid standard replicates for each assay was below 0.5 CT and standard values did not vary more than 1 CT between experiments or the results were discarded and the experiment was repeated as pre-specified. In addition, limit of detection for each assay was established using reference standards of known copy number, spike in experiments with leukemia cell line (K562) cDNA or cDNA from a patient sample harboring a known mutation of interest. Reference standards of known concentration were run for each gene with every batch of patient samples. All MRD calls were made while blind to clinical relapse and cytogenetics information unless otherwise specified. Detailed information for each assay is described below.

### WT1 RQ-PCR

Normalized WT1 Copy number was assessed using the European LeukemiaNet WT1 and ABL1 assays (**Table S2**). Reactions were carried out using Taqman Universal Mastermix (Life technologies Carlsbad CA) in a 25 $\mu$ L reaction. Copies were assigned using plasmid standards of known copy number for WT1 and ABL1 genes. MRD levels are reported as the normalized copy number of WT1 transcripts per 10<sup>4</sup> ABL transcripts (WT1/ABLx10<sup>4</sup>). Limit of detection and copy number values for WT1 and ABL1 assays were assigned by plasmid standard dilution experiments using the Ipsogen ProfileQuant WT1 kit and the limit of detection was established as 2x10<sup>4</sup> using spike-in experiments with a cell line expressing WT1 (K562). Samples were thermocycled in a RotorgeneQ thermocycler (Qiagen, Valencia, CA). Thermocycling conditions were 2 min at 50°C, 10 min activation at 95°C, and 50 cycles of denaturation at 95°C for 15 sec and annealing/extension at 60°C.

## **NPM1mut MRD**

Presence of mutated NPM1 was assessed using the assays for mutation types A, B, and D published by the German-Austrian acute myeloid leukemia study group. Together, these assays account for nearly 90% of AML NPM1 mutations. In order to increase the throughput of screening for NPM1 mutations using a high amount of cDNA (100ng) in each reaction, we used a multiplex approach with three mutation-specific reverse primers in triplicate, again with the ABL1 control gene in duplicate. This high throughput method was verified on a patient sample harboring a known type A insertion at presentation. RQ PCR was performed in 25 $\mu$ L reactions with 1.25 U AmpliTaq Gold, 1X Taqman PCR buffer, 4mM MgCl<sub>2</sub>, 400nM NPM1 forward primer, 300nM type A, B, and D mutation reverse primers and 300nM FAM/MGB labeled NPM1 probe. The limit of detection of the assay based on a plasmid standard curve was determined and positivity was designated as n=3 of 3 replicates with ct values below the limit of detection of the assay (ct =35.81). All hits were verified to have sigmoidal amplification patterns. Type A CATA insertions were verified with the Ipsogen MutaQuant kit for NPM1. RotorgeneQ thermocycler (Qiagen, Valencia, CA) conditions were 2 min at 50°C, 10 min activation at 95°C, and 50 cycles of denaturation at 95°C for 15 sec and annealing/extension at 62°C. No template control wells were completely negative with any signal below the baseline for all experiments or the results were discarded and the experiment was repeated as pre-specified.

## **Multigene Array MRD**

72 autograft samples (18 per plate) were assessed for transcript levels of ABL1, WT1, MSLN, PRAME, PRTN3, CCNA1. Plates contain internal control reactions for genomic DNA contamination, PCR efficiency and reverse transcription reaction efficiency in a 384-well custom built PCR array plate (Qiagen, Valencia, CA). Healthy control samples previously used for calculating baseline expression, cDNA from the leukemia cell line K562, and a plasmid for each target amplicon was run on each plate to ensure there were no plate printing or reagent-derived batch effects with each of the 6 plates used in this study. Plates utilized 10 $\mu$ L PCR reactions for each assay with SYBR Green ROX chemistry and were thermocycled on an ABI 7900 (Applied Biosystems, Foster City, CA). PCR Conditions were 2 min at 50°C, 10 min activation at 95°C, and 50 cycles of denaturation at 95°C for 15 sec and annealing/extension at 60°C. Gene expression was assessed relative to the ABL1 housekeeping gene. These expression ( $\Delta$ ct) values are plotted against expression seen in normal controls. In this study, thresholds were set relative to the GCSF stimulated peripheral blood healthy donor cohort from UCSF; the threshold was one half standard deviation above the maximum level seen.

## Chromosomal Translocations

All 72 samples were assayed for the presence of chromosomal translocations Inv(16)(p13q22) (CBFB-MYH11) Type A (Expected frequency 88%), t(8;21)(q22;q22) (AML1-ETO), t(15;17)(q22;q21), (PML-RARA) breakpoint cluster 1 and 3 (expected frequency bcr1- 55%, bcr3 - 40%) while blinded to the cytogenetic profile of each patient. Samples were screened using 45ng RNA equivalent cDNA per reaction in technical replicates for each assay (**Table S2**), with Taqman Universal Mastermix (Life Technologies, Carlsbad CA) in a 10 $\mu$ L reaction using ABL1 as a control gene. After being un-blinded to patient cytogenetic information (see figure 4), we further interrogated samples harboring chromosomal translocations at presentation using 100ng of cDNA in triplicate for genes of interest with ABL1 as a control gene in 25 $\mu$ L reactions. Positivity was defined as a positive PCR signal with Ct < 36 in 3 of 3 technical replicates. RotorgeneQ thermocycler (Qiagen, Valencia, CA) conditions were 2 min at 50°C, 10 min activation at 95°C, and 50 cycles of denaturation at 95°C for 15 sec and annealing/extension at 60°C.

## Statistical Analysis

Continuous data are reported as mean ( $\pm$  SD), and time data are reported as median (range). Categorical data are reported as frequency (%). Multivariate analyses of clinical data were performed using STATA SE 9 (StataCorp LP, College Station, TX). A *p*-value of <0.05 was considered significant. Kaplan-Meier curves were generated using GraphPad Prism (GraphPad Software, La Jolla, CA) and statistical differences assessed via Log-Rank and Wilcoxon analyses. Multivariate analysis of RQ-PCR data was performed with JMP (SAS, Cary, NC). Inferential statistical analysis of RQ-PCR data was performed with Graphpad Prism. RQ-PCR data analyzed with Rotor-Gene Q series Software 2.1.0 (Qiagen, Valencia, CA) or SDS 2.3 (Applied Biosystems, Foster City, CA).

## Clinical Information

Patient histories were obtained retrospectively via two electronic medical record systems as well as via physical chart review. Two publicly available, online death indices—the Social Security Death Index (1935-2014) and the California Death Index (1940-1997)—were accessed to ensure accurate dates of death, with censoring of data on March 1, 2015. The study was approved by the UCSF Committee on Human Research with a waiver for the requirement of individual HIPAA authorization based on minimal risk. Freedom from relapse was defined as the interval between AutoHCT and relapse, as determined by standard criteria. Overall survival was defined as the interval between AutoHCT and last follow-up. Patients were determined to have therapy-related myeloid neoplasm (t-MN) rather than AML relapse if the diagnosis was made 18 months after AutoHCT and the t-MN harbored complex cytogenetics or other chromosomal abnormalities typical of secondary AML.

## SUPPLEMENTAL FIGURES

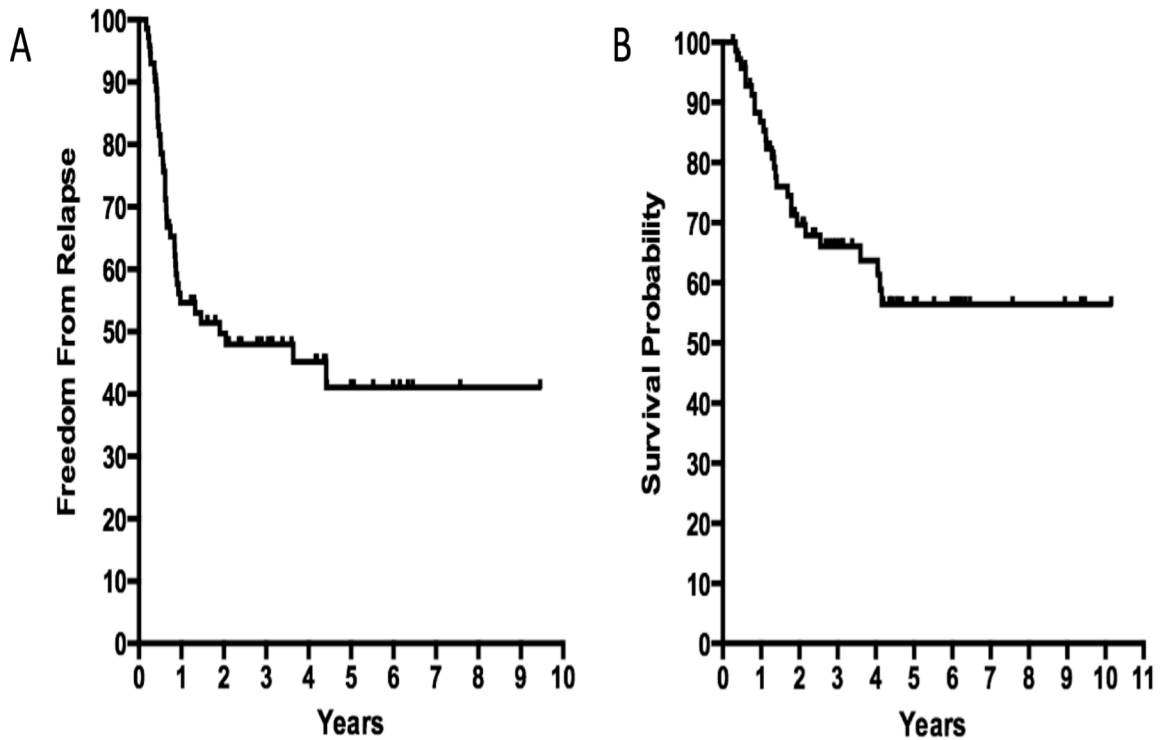

### Supplemental Figure 1: Patient Survival Information

(A) Freedom from Relapse and (B) Overall Survival. The outcomes of this cohort appear representative of the recent experience at this center (UCSF) with overall FFR at 1yr (55%) and 5yr(41%) and OS at 1yr (85%) and 5yr (56%). The majority of patients (65%) had intermediate cytogenetic risk, of whom 54% remained alive and 39% remained relapse-free at five years post transplant.

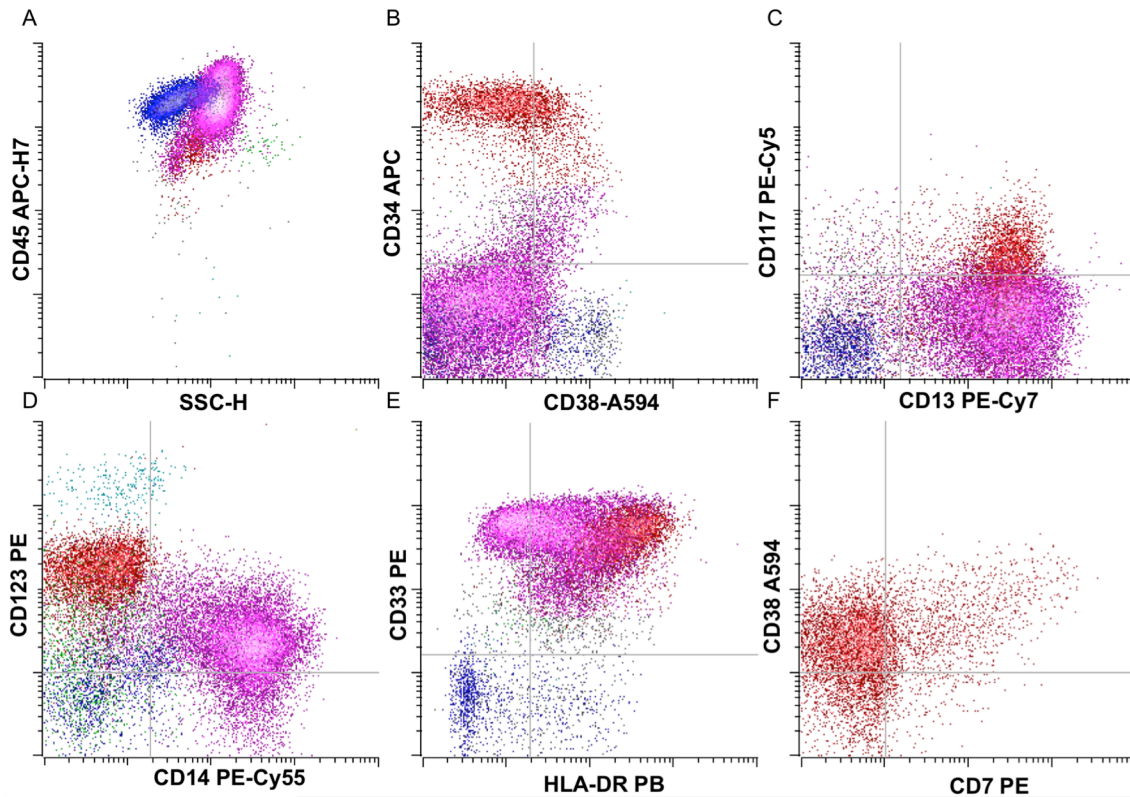

**Supplemental Figure 2: Leukemia immunophenotype is not detected by Flow Cytometry in the Autograft.** Representative sample shown. A) Mixture of lymphocytes (blue) and expanded monocytes (magenta) with a small subset of CD34-positive progenitors (red) detected. B) The CD34-positive progenitors consist largely of a stem cell-like population (low to absent CD38) without significant maturation to lineage-committed forms. However, in contrast to the similar population seen in resting bone marrow, increased expression of D) CD123 and E) CD33 was noted on the CD34-positive progenitors (often seen in actively regenerating marrow after chemotherapy, particularly when growth factors are used). F) In at least 10% of the samples unusual CD7 expression was noted on a subset of the CD34-positive progenitors that extended to more immature forms having low CD38, this was judged to be a consequence of the process used to mobilize the stem cells (GCSF) rather than an immunophenotypic abnormality. All these findings are typical of stem cell products of this type at the center analyzing the data (Fred Hutch Cancer Center). In no sample was a discrete population having an immunophenotype different from the above CD34-positive progenitors and mature monocytes identified.

### A CCNA1 GCSF Match Case Control

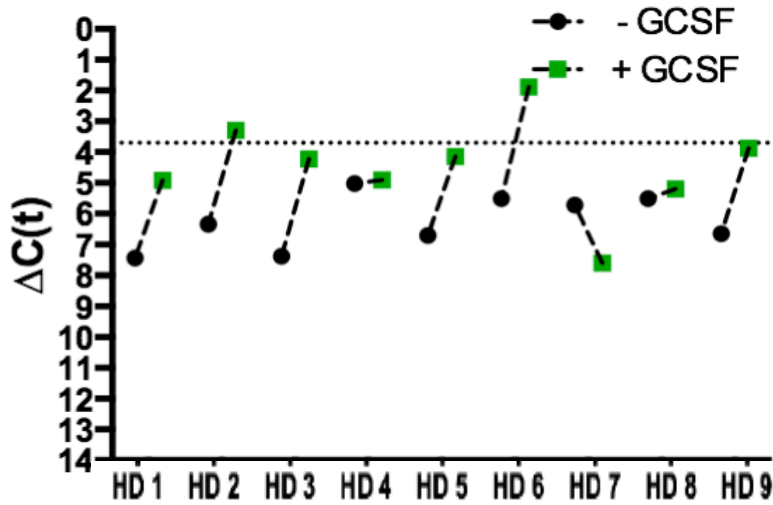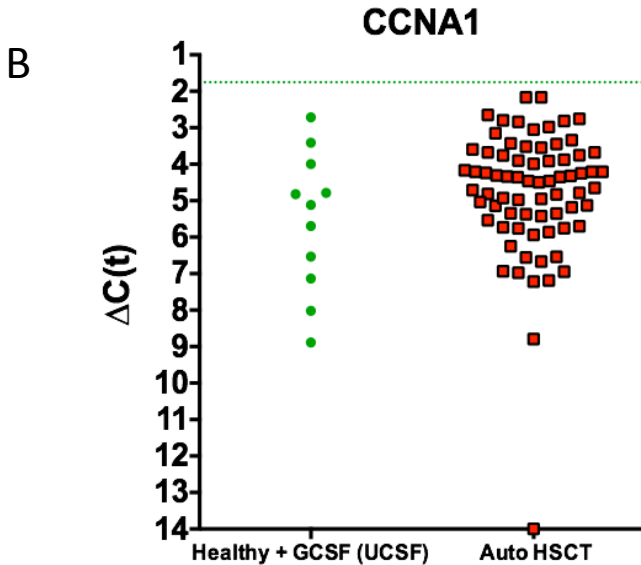

**Supplemental Figure 3: CCNA1 is suboptimal for AML MRD detection in Autograft samples.** While previously shown to have utility for AML MRD detection in peripheral blood samples taken prior to allogeneic transplantation (Goswami *et. al.*, 2015, ref 19) it had no use in this autograft setting. A) CCNA1 expression increases, in NIH healthy donors, following treatment with GCSF. B) CCNA1 levels in autografts from AML patients did not exceed levels seen in autografts from healthy donors.

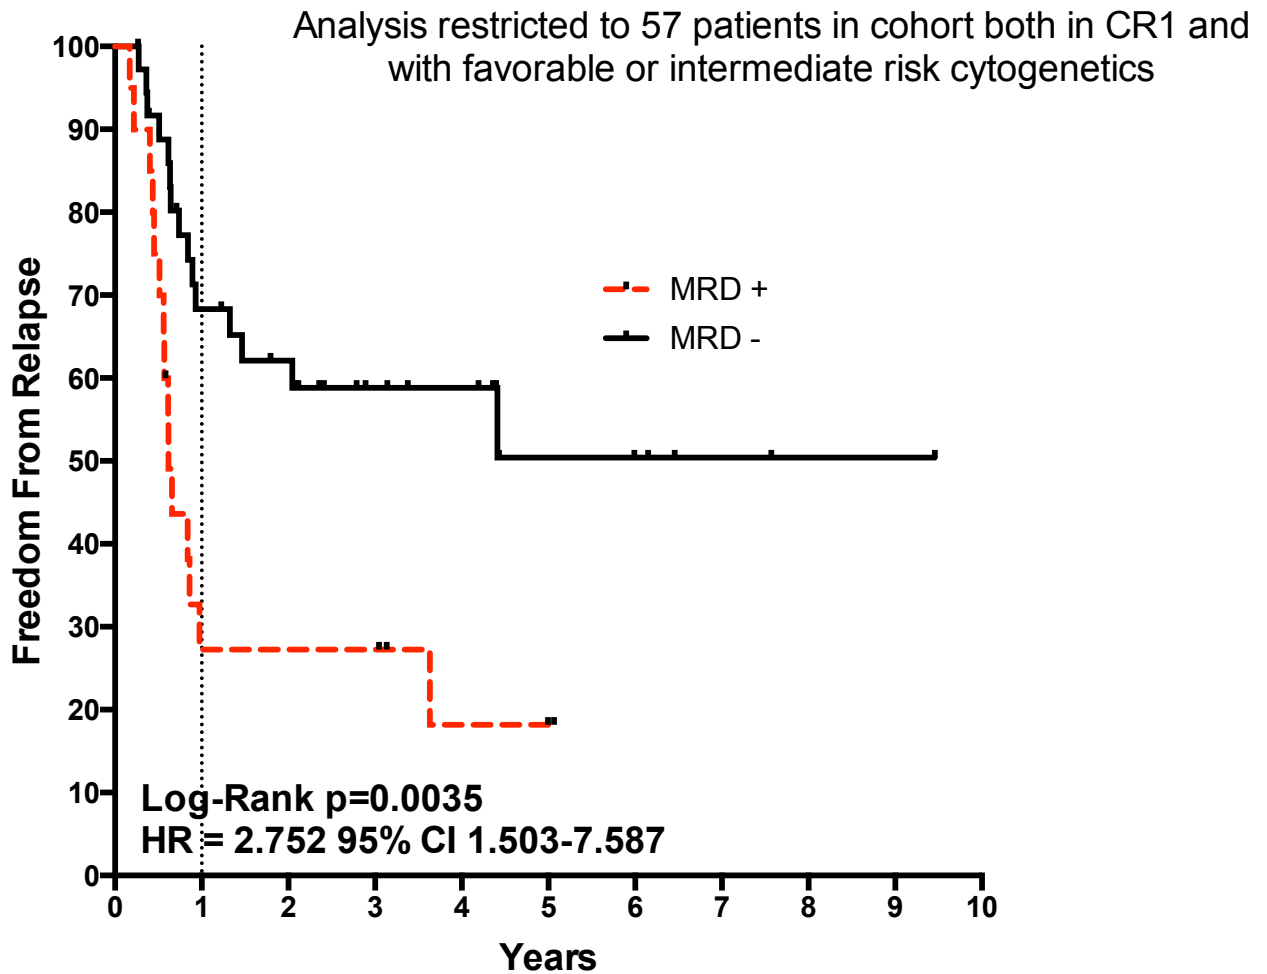

|                       | All Patients | CR1, Int and Fav Risk Only |
|-----------------------|--------------|----------------------------|
| N=                    | 72           | 57                         |
| MRD+ (1yr FFR)        | 28%          | 27%                        |
| MRD- (1yr FFR)        | 67%          | 68%                        |
| Log-rank (Mantel-Cox) | 0.0023       | 0.0035                     |
| Hazard Ratio          | 2.614        | 2.752                      |
| HR 95% CI             | 1.530-6.839  | 1.503-7.7587               |

**Supplemental Figure 4: Restricting analysis to subset of patients in CR1 with favorable and intermediate risk cytogenetics does not change impact of MRD.** Eight patients in the original cohort of 72 analyzed in this work were not in CR1 at the time of transplant of whom two also had poor risk or unknown cytogenetics. In addition seven patients were in CR1 but had poor risk cytogenetics (n=2), secondary AML (n=2) or had unknown cytogenetics (n=3). (See Table 1 and Supplemental Table 1) Excluding these 15 patients from the analysis did not change the impact of autograft MRD detection on post-transplant outcomes.



**Supplemental Table 1** Expanded patient characteristics

| Patient ID | Sex | Cytogenetics/ Molecular                           | Primary Cyto Code<br>0=Unk<br>1=Int<br>2=CBF<br>3=Poor<br>4=Secondary<br>5=M3 | Remission type | Protocol    | CD34+ Dose x10 <sup>6</sup> /kg | Age at Transplant | OS    | Relapsed | RFS  |
|------------|-----|---------------------------------------------------|-------------------------------------------------------------------------------|----------------|-------------|---------------------------------|-------------------|-------|----------|------|
| 1          | F   | 46,XX,t(8;21)(q22;q22)[20]                        | 2                                                                             | PIF            | 9302        | unk                             | 27                | 0.38  | YES      | 0.24 |
| 2          | F   | normal                                            | 1                                                                             | CR1            | 9302        | 2.63                            | 54                | 0.33  | YES      | 0.28 |
| 3          | F   | normal                                            | 1                                                                             | CR1            | 9302        | 6.34                            | 28                | 2.16  | YES      | 0.44 |
| 4          | F   | normal                                            | 1                                                                             | CR1            | 9302        | 12.50                           | 49                | 1.40  | YES      | 0.51 |
| 5          | F   | unk                                               | 0                                                                             | CR2            | 9302        | 5.61                            | 52                | 1.34  | YES      | 0.43 |
| 6          | F   | 11q23                                             | 3                                                                             | CR1            | 9302        | unk                             | 64                | 1.06  | YES      | 0.44 |
| 7          | F   | normal                                            | 1                                                                             | CR1            | 9302        | 3.94                            | 64                | 7.57  | NO       | 7.57 |
| 8          | F   | normal                                            | 1                                                                             | CR1            | CALGB 19808 | 8.77                            | 42                | 5.07  | NO       | 5.07 |
| 9          | M   | unk                                               | 0                                                                             | CR1            | 9302        | 7.02                            | 44                | 5.52  | NO       | 5.52 |
| 10         | F   | normal                                            | 1                                                                             | CR1            | TargBu      | 10.05                           | 57                | 1.94  | YES      | 0.84 |
| 11         | M   | normal                                            | 1                                                                             | CR1            | CALGB 10503 | 22.12                           | 41                | 0.83  | YES      | 0.66 |
| 12         | F   | t(8;21), ckit (+)                                 | 2                                                                             | CR1            | 9302        | 7.30                            | 28                | 1.80  | NO       | 1.80 |
| 13         | M   | normal                                            | 1                                                                             | CR1            | TargBu      | 8.28                            | 36                | 3.05  | NO       | 3.05 |
| 14         | F   | normal                                            | 1                                                                             | CR1            | 9302        | 35.40                           | 53                | 1.28  | YES      | 0.41 |
| 15         | F   | normal                                            | 1                                                                             | CR1            | TargBu      | 33.36                           | 58                | 4.36  | NO       | 4.36 |
| 16         | M   | normal                                            | 1                                                                             | CR1            | 9302        | 4.98                            | 61                | 4.40  | NO       | 4.40 |
| 17         | M   | 47,XY,+10,t(11;12)(q13;p13)[6]/46,XY[12]          | 1                                                                             | CR1            | 2901        | 7.93                            | 64                | 4.55  | YES      | 3.64 |
| 18         | M   | normal                                            | 1                                                                             | CR1            | TargBu      | 11.49                           | 54                | 1.33  | YES      | 1.33 |
| 19         | M   | normal                                            | 1                                                                             | CR1            | 9302        | 5.64                            | 38                | 4.58  | YES      | 0.74 |
| 20         | M   | 46,XY, with rearrangement of 1 and 11 [20 of 20 c | 3                                                                             | CR1            | 9302        | 14.78                           | 28                | 1.30  | NO       | 1.30 |
| 21         | M   | unk                                               | 0                                                                             | CR1            | unk         | 8.44                            | 45                | 1.79  | YES      | 0.87 |
| 22         | F   | 46,XX,t(8;21)(q22;q22)[19]/46,XX[1]               | 4                                                                             | CR1            | unk         | 2.34                            | 66                | 3.60  | NO       | 3.60 |
| 23         | M   | normal                                            | 1                                                                             | CR1            | 9302        | 11.02                           | 54                | 0.58  | NO       | 0.58 |
| 24         | F   | normal                                            | 1                                                                             | CR1            | 9302        | 9.25                            | 69                | 4.11  | YES      | 2.05 |
| 25         | F   | t(8;21) by FISH                                   | 2                                                                             | CR1            | 9302        | 33.80                           | 48                | 2.12  | NO       | 2.12 |
| 26         | F   | t(1;11)                                           | 1                                                                             | CR1            | 9302        | 4.22                            | 34                | 0.39  | NO       | 0.39 |
| 27         | M   | normal                                            | 1                                                                             | CR1            | 9302        | 7.56                            | 64                | 0.98  | YES      | 0.57 |
| 28         | F   | t(8;21)                                           | 2                                                                             | CR1            | 9302        | 3.32                            | 60                | 2.69  | YES      | 0.98 |
| 29         | F   | normal                                            | 1                                                                             | CR1            | 9302        | 8.03                            | 44                | 0.59  | YES      | 0.22 |
| 30         | M   | inv(16), trisomy 8, trisomy 22                    | 2                                                                             | CR1            | 9302        | 9.08                            | 41                | 0.60  | YES      | 0.52 |
| 31         | M   | trisomy 21                                        | 1                                                                             | CR1            | TargBu      | 5.50                            | 61                | 2.96  | YES      | 0.90 |
| 32         | F   | t(8;21)                                           | 2                                                                             | CR1            | TargBu      | 6.88                            | 29                | 3.13  | NO       | 3.13 |
| 33         | F   | t(13;21) in 75% of metaphases                     | 1                                                                             | CR1            | TargBu      | 9.21                            | 53                | 3.14  | NO       | 3.14 |
| 34         | F   | normal                                            | 2                                                                             | CR3            | 9302        | unk                             | 26                | 0.47  | YES      | 0.47 |
| 37         | F   | normal                                            | 1                                                                             | CR1            | 9302        | 13.29                           | 57                | 0.83  | YES      | 0.36 |
| 38         | F   | t(9;11)                                           | 1                                                                             | CR1            | TargBu      | 10.06                           | 39                | 1.12  | YES      | 0.38 |
| 39         | M   | derivative (13;14) robertsonian translocation     | 1                                                                             | CR1            | TargBu      | 7.96                            | 24                | 4.15  | YES      | 0.86 |
| 40         | M   | trisomy 8                                         | 1                                                                             | CR1            | 9302        | 9.83                            | 41                | 4.43  | NO       | 4.43 |
| 41         | F   | normal                                            | 1                                                                             | CR1            | 9302        | 11.04                           | 52                | 5.99  | NO       | 5.99 |
| 42         | M   | t(8;21)                                           | 2                                                                             | CR1            | 9302        | 10.90                           | 24                | 6.07  | YES      | 0.56 |
| 43         | M   | normal                                            | 1                                                                             | CR1            | 9302        | 6.34                            | 48                | 6.15  | NO       | 6.15 |
| 44         | F   | normal                                            | 1                                                                             | CR1            | 9302        | 7.45                            | 40                | 1.38  | YES      | 0.62 |
| 45         | M   | normal                                            | 1                                                                             | CR1            | 9302        | 38.13                           | 67                | 5.00  | NO       | 5.00 |
| 46         | M   | inv16                                             | 2                                                                             | CR1            | 9302        | unk                             | 44                | 6.23  | YES      | 0.62 |
| 47         | M   | normal                                            | 1                                                                             | CR2            | 9302        | 10.59                           | 25                | 2.55  | YES      | 0.26 |
| 48         | F   | unk                                               | 0                                                                             | CR1            | 9302        | 10.77                           | 37                | 6.34  | NO       | 6.34 |
| 49         | M   | inv16, triz22                                     | 2                                                                             | CR1            | 9302        | 6.42                            | 30                | 3.38  | NO       | 3.38 |
| 50         | M   | normal                                            | 1                                                                             | CR1            | 9302        | 10.14                           | 37                | 6.46  | NO       | 6.46 |
| 51         | M   | inv16,+8                                          | 2                                                                             | CR1            | 9302        | 17.26                           | 35                | 0.71  | NO       | 0.71 |
| 52         | M   | t(8;21)                                           | 2                                                                             | CR1            | 9302        | unk                             | 33                | 2.36  | NO       | 2.36 |
| 53         | F   | normal                                            | 1                                                                             | CR1            | 9302        | 3.80                            | 69                | 1.13  | YES      | 0.64 |
| 54         | F   | normal                                            | 1                                                                             | CR1            | 9302        | 12.27                           | 54                | 4.69  | YES      | 0.17 |
| 55         | M   | normal                                            | 1                                                                             | CR1            | 9302        | 10.80                           | 55                | 1.23  | NO       | 1.23 |
| 56         | F   | normal                                            | 1                                                                             | CR1            | 9302        | 10.31                           | 34                | 1.79  | YES      | 0.93 |
| 57         | F   | normal                                            | 1                                                                             | CR1            | 9302        | 8.38                            | 43                | 2.41  | NO       | 2.41 |
| 58         | M   | inv(16)(p13.1q22)[20]0                            | 2                                                                             | CR1            | 9302        | unk                             | 30                | 2.89  | NO       | 2.89 |
| 59         | F   | t(11;12)                                          | 1                                                                             | CR1            | CALGB 19808 | unk                             | 50                | 4.19  | NO       | 4.19 |
| 60         | M   | normal                                            | 1                                                                             | CR1            | CALGB 19808 | 13.12                           | 43                | 4.05  | YES      | 1.47 |
| 61         | M   | trisomy 6                                         | 1                                                                             | CR1            | 9302        | 61.88                           | 26                | 9.36  | YES      | 0.84 |
| 62         | M   | trisomy 8, -Y                                     | 1                                                                             | CR1            | 9302        | 9.02                            | 58                | 1.69  | YES      | 0.45 |
| 63         | F   | normal                                            | 1                                                                             | CR1            | 9302        | 11.80                           | 57                | 9.46  | NO       | 9.46 |
| 65         | F   | normal                                            | 1                                                                             | CR2            | 9302        | 8.27                            | 36                | 1.88  | NO       | 1.61 |
| 66         | M   | 46,XX,t(X;19)(q23;p13.1)[20]                      | 1                                                                             | CR2            | 9302        | unk                             | 60                | 4.19  | NO       | 4.19 |
| 67         | F   | normal                                            | 1                                                                             | CR1            | 9302        | 13.81                           | 51                | 8.94  | YES      | 4.41 |
| 68         | F   | 13a, 14q, 20q del                                 | 3                                                                             | CR2            | 9302        | 9.77                            | 56                | 0.41  | NO       | 0.41 |
| 69         | F   | normal                                            | 4                                                                             | CR1            | CALGB 19808 | 9.60                            | 57                | 4.16  | NO       | 4.16 |
| 71         | F   | inv(16)                                           | 2                                                                             | CR1            | 9302        | 11.51                           | 48                | 10.15 | YES      | 0.62 |
| 72         | M   | positive PML/RARA, 46,XY                          | 5                                                                             | CR2            | 9302        | 5.90                            | 62                | 4.05  | YES      | 1.90 |
| 73         | M   | inv16                                             | 2                                                                             | CR1            | 9302        | 7.14                            | 47                | 0.27  | NO       | 0.27 |
| 74         | M   | normal                                            | 1                                                                             | CR1            | 9302        | 6.50                            | 45                | 2.08  | NO       | 2.08 |
| 75         | F   | 47,XX,+8,i(8)(q10)x2(17)/47,XX,+8(2)/46,XX[1]     | 1                                                                             | CR1            | 9302        | 3.00                            | 65                | 0.76  | YES      | 0.64 |
| 76         | F   | normal                                            | 1                                                                             | CR1            | 9302        | 10.57                           | 57                | 2.79  | NO       | 2.79 |

**Supplemental Table 2** High throughput RQ-PCR array SYBR green assays for WT1, PRAME, PR3, CCNA1, MSLN, and ABL1. (Qiagen).

A)

| Symbol | Description                                    | Unigene No | Refseq No | Band Size (bp) | Reference Position | NCBI Link                                                                                                                                                                             |
|--------|------------------------------------------------|------------|-----------|----------------|--------------------|---------------------------------------------------------------------------------------------------------------------------------------------------------------------------------------|
| WT1    | Wilms tumor 1                                  | Hs.591980  | NM_000378 | 162            | 674                | <a href="http://www.ncbi.nlm.nih.gov/gene?term=NM_000378&amp;doptcmd=Graphics&amp;cmd=search">http://www.ncbi.nlm.nih.gov/gene?term=NM_000378&amp;doptcmd=Graphics&amp;cmd=search</a> |
| PRAME  | Preferentially expressed antigen in melanoma   | Hs.30743   | NM_006115 | 135            | 1290               | <a href="http://www.ncbi.nlm.nih.gov/gene?term=NM_006115&amp;doptcmd=Graphics&amp;cmd=search">http://www.ncbi.nlm.nih.gov/gene?term=NM_006115&amp;doptcmd=Graphics&amp;cmd=search</a> |
| PRTN3  | Proteinase 3                                   | Hs.529     | NM_002777 | 92             | 653                | <a href="http://www.ncbi.nlm.nih.gov/gene?term=NM_002777&amp;doptcmd=Graphics&amp;cmd=search">http://www.ncbi.nlm.nih.gov/gene?term=NM_002777&amp;doptcmd=Graphics&amp;cmd=search</a> |
| CCNA1  | Cyclin A1                                      | Hs.417050  | NM_003914 | 120            | 1571               | <a href="http://www.ncbi.nlm.nih.gov/gene?term=NM_003914&amp;doptcmd=Graphics&amp;cmd=search">http://www.ncbi.nlm.nih.gov/gene?term=NM_003914&amp;doptcmd=Graphics&amp;cmd=search</a> |
| MSLN   | Mesothelin                                     | Hs.408488  | NM_005823 | 119            | 1267               | <a href="http://www.ncbi.nlm.nih.gov/gene?term=NM_005823&amp;doptcmd=Graphics&amp;cmd=search">http://www.ncbi.nlm.nih.gov/gene?term=NM_005823&amp;doptcmd=Graphics&amp;cmd=search</a> |
| ABL1   | C-abl oncogene 1, non-receptor tyrosine kinase | Hs.431048  | NM_005157 | 81             | 5253               | <a href="http://www.ncbi.nlm.nih.gov/gene/25">http://www.ncbi.nlm.nih.gov/gene/25</a>                                                                                                 |

B) Primer and Probe sequences used for Real Time Quantitative PCR used in this study.

| Assay                             | Assay Reference | Forward Primer Sequence 5'-3'             | Reverse Primer Sequence 5'-3' | Probe sequence 5'-3'                                      |
|-----------------------------------|-----------------|-------------------------------------------|-------------------------------|-----------------------------------------------------------|
| NPM1 Type A                       | Kronke et al    | GAA GAA TTG CTT CCG GAT GACT              | CTT CCT CCA CTG CCA GAC AGA   | FAM-ACCAAGAGGCTATTCAAGAT-MGB                              |
| NPM1 Type B                       | Kronke et al    | GAA GAA TTG CTT CCG GAT GACT              | TTC CTC CAC TGC CAT GCA G     | FAM-ACCAAGAGGCTATTCAAGAT-MGB                              |
| NPM1 Type D                       | Kronke et al    | GAA GAA TTG CTT CCG GAT GACT              | TTC CTC CAC TGC CCT GCA G     | FAM-ACCAAGAGGCTATTCAAGAT-MGB                              |
| Inv16(p13q22) (CBFB-MYH11)        | Gabert et al    | CAT TAG CAC AAC AGG CCT TTG A             | AGG GCC CGC TTG GAC TT        | 6-FAM-TCG CGT GTC /ZEN/CTT CTC CGA GCC T-IABKFQ           |
| t(8;21)(q22;q22) (AML1-ETO)       | Gabert et al    | CAC CTA CCA CAG AGC CAT CAA               | ATC CAC AGG TGA GTC TGG CAT T | 6-FAM-AAC CTC GAA /ZEN/ATC GTA CTG AGA AGC ACT CCA-IABKFQ |
| t(15;17)(q22;q21) (PML-RARA) bcr1 | Gabert et al    | TCT TCC TGC CCA ACA GCA A                 | GCT TGT AGA TGC GGG GTA GAG   | 6-FAM-AGT GCC CAG /ZEN/CCC TCC CTC GC-IABKFQ              |
| t(15;17)(q22;q21) (PML-RARA) bcr3 | Gabert et al    | CGG ATG GCT TCG ACG AGT T                 | GCT TGT AGA TGC GGG GTA GAG   | 6-FAM-AGT GCC CAG /ZEN/CCC TCC CTC GC-IABKFQ              |
| WT1                               | Calloni et al   | CGC TAT TCG CAA TCA GGG TTA               | GGG CGT GTC ACC GTA GCT       | Cy5-AGC ACG GTC ACC TTC GAC GGG A-IABR0Sp                 |
| ABL1                              | Bellard et al   | TGG AGA TAA CAC TCT AAG CAT AAC TAA AGG T | GAT GTA GTT GCT TGG GAC CCA   | 5HEX-CCA TTT TTG /ZEN/GTT TGG GCT TCA CAC CAT T-IABKFQ    |

**Supplemental Table 3** Essential Minimum Information for Publication (MIQE) requirements met in this study.

| ESSENTIAL ITEMS of Minimum Information for Publication (MIQE) for RQ-PCR Experiments | IMPORTANCE | CHECKLIST |
|--------------------------------------------------------------------------------------|------------|-----------|
| <b>EXPERIMENTAL DESIGN</b>                                                           |            |           |
| Definition of experimental and control groups                                        | ESSENTIAL  | YES       |
| Number within each group                                                             | ESSENTIAL  | YES       |
| <b>SAMPLE</b>                                                                        |            |           |
| Description                                                                          | ESSENTIAL  | YES       |
| Microdissection or macrodissection                                                   | ESSENTIAL  | NA        |
| Processing procedure                                                                 | ESSENTIAL  | YES       |
| If frozen - how and how quickly?                                                     | ESSENTIAL  | YES       |
| If fixed - with what, how quickly?                                                   | ESSENTIAL  | NA        |
| Sample storage conditions and duration (especially for FFPE samples)                 | ESSENTIAL  | YES       |
| <b>NUCLEIC ACID EXTRACTION</b>                                                       |            |           |
| Procedure and/or instrumentation                                                     | ESSENTIAL  | YES       |
| Name of kit and details of any modifications                                         | ESSENTIAL  | YES       |
| Details of DNase or RNase treatment                                                  | ESSENTIAL  | YES       |
| Contamination assessment (DNA or RNA)                                                | ESSENTIAL  | YES       |
| Nucleic acid quantification                                                          | ESSENTIAL  | YES       |
| Instrument and method                                                                | ESSENTIAL  | YES       |
| RNA integrity method/instrument                                                      | ESSENTIAL  | YES       |
| RIN/RQI or Cq of 3' and 5' transcripts                                               | ESSENTIAL  | YES       |
| Inhibition testing (Cq dilutions, spike or other)                                    | ESSENTIAL  | YES       |
| <b>REVERSE TRANSCRIPTION</b>                                                         |            |           |
| Complete reaction conditions                                                         | ESSENTIAL  | YES       |
| Amount of RNA and reaction volume                                                    | ESSENTIAL  | YES       |
| Priming oligonucleotide (if using GSP) and concentration                             | ESSENTIAL  | YES       |
| Reverse transcriptase and concentration                                              | ESSENTIAL  | YES       |
| Temperature and time                                                                 | ESSENTIAL  | YES       |
| <b>qPCR TARGET INFORMATION</b>                                                       |            |           |
| If multiplex, efficiency and LOD of each assay.                                      | ESSENTIAL  | NA        |
| Sequence accession number                                                            | ESSENTIAL  | YES       |
| Amplicon length                                                                      | ESSENTIAL  | YES       |
| <i>In silico</i> specificity screen (BLAST, etc)                                     | ESSENTIAL  | YES       |
| Location of each primer by exon or intron (if applicable)                            | ESSENTIAL  | YES       |
| What splice variants are targeted?                                                   | ESSENTIAL  | NA        |
| <b>qPCR OLIGONUCLEOTIDES</b>                                                         |            |           |
| Primer sequences                                                                     | ESSENTIAL  | YES       |
| Location and identity of any modifications                                           | ESSENTIAL  | YES       |
| <b>qPCR PROTOCOL</b>                                                                 |            |           |
| Complete reaction conditions                                                         | ESSENTIAL  | YES       |
| Reaction volume and amount of cDNA/DNA                                               | ESSENTIAL  | YES       |
| Primer, (probe), Mg <sup>++</sup> and dNTP concentrations                            | ESSENTIAL  | YES       |
| Polymerase identity and concentration                                                | ESSENTIAL  | YES       |
| Buffer/kit identity and manufacturer                                                 | ESSENTIAL  | YES       |
| Additives (SYBR Green I, DMSO, etc.)                                                 | ESSENTIAL  | YES       |
| Complete thermocycling parameters                                                    | ESSENTIAL  | YES       |
| Manufacturer of qPCR instrument                                                      | ESSENTIAL  | YES       |
| <b>qPCR VALIDATION</b>                                                               |            |           |
| Specificity (gel, sequence, melt, or digest)                                         | ESSENTIAL  | YES       |
| For SYBR Green I, Cq of the NTC                                                      | ESSENTIAL  | YES       |
| Standard curves with slope and y-intercept                                           | ESSENTIAL  | YES       |
| PCR efficiency calculated from slope                                                 | ESSENTIAL  | YES       |
| r <sup>2</sup> of standard curve                                                     | ESSENTIAL  | YES       |
| Linear dynamic range                                                                 | ESSENTIAL  | YES       |
| Cq variation at lower limit                                                          | ESSENTIAL  | YES       |
| Evidence for limit of detection                                                      | ESSENTIAL  | YES       |
| If multiplex, efficiency and LOD of each assay.                                      | ESSENTIAL  | NA        |
| <b>DATA ANALYSIS</b>                                                                 |            |           |
| qPCR analysis program (source, version)                                              | ESSENTIAL  | YES       |
| Cq method determination                                                              | ESSENTIAL  | YES       |
| Outlier identification and disposition                                               | ESSENTIAL  | YES       |
| Results of NTCs                                                                      | ESSENTIAL  | YES       |
| Justification of number and choice of reference genes                                | ESSENTIAL  | YES       |
| Description of normalisation method                                                  | ESSENTIAL  | YES       |
| Number and stage (RT or qPCR) of technical replicates                                | ESSENTIAL  | YES       |
| Repeatability (intra-assay variation)                                                | ESSENTIAL  | YES       |
| Statistical methods for result significance                                          | ESSENTIAL  | YES       |
| Software (source, version)                                                           | ESSENTIAL  | YES       |
